1 **Increased frequency of CD4<sup>+</sup> and CD8<sup>+</sup> follicular helper T cells in human lymph node biopsies**  
2 **during the earliest stages of rheumatoid arthritis**

3 Dornatien C. Anang<sup>1,2†</sup>, Tamara H. Ramwadhoebe<sup>1,2†</sup>, Janine Hahnlein<sup>1,2</sup>, Bo van Kuijk<sup>1,2</sup>, N. Smits<sup>1,2</sup>,  
4 Krijn P. van Lienden<sup>3</sup>, Mario Maas<sup>3</sup>, Danielle M. Gerlag<sup>1,4</sup>, Paul P. Tak<sup>1,5,6</sup>, Niek de Vries<sup>1,2</sup>, Lisa G.  
5 van Baarsen<sup>1,2\*</sup>

6 <sup>1</sup>Department of Rheumatology & Clinical Immunology, Amsterdam Rheumatology & Immunology  
7 Center (ARC), Amsterdam, Netherlands. <sup>2</sup>Department of Experimental Immunology, Amsterdam  
8 Infection & Immunity Institute, Amsterdam UMC, University of Amsterdam, Amsterdam,  
9 Netherlands. <sup>3</sup>Department of Radiology, Amsterdam UMC, University of Amsterdam, Amsterdam,  
10 Netherlands. <sup>4</sup>UCB pharma, Slough, UK. <sup>5</sup>Candel Therapeutics, Needham, Massachusetts, USA.  
11 <sup>6</sup>Department of Internal Medicine, Cambridge University, Cambridge, UK

12 †These authors contributed equally

13 **\* Correspondence:**

14 Lisa G. van Baarsen, PhD, Department of Rheumatology and Clinical Immunology and Department of  
15 Experimental Immunology, Amsterdam UMC, University of Amsterdam, Meibergdreef 9, 1105 AZ,  
16 Amsterdam, The Netherlands. Phone: +31 20 56 64969, Fax: +31 20 6919658, Email:  
17 [e.g.vanbaarsen@amsterdamumc.nl](mailto:e.g.vanbaarsen@amsterdamumc.nl)

18 **Keywords:** Rheumatoid arthritis, lymph nodes, T-lymphocytes, B-lymphocytes, follicular T helper  
19 cells

20

21

22 **ABSTRACT**

23 **Objectives:** Follicular helper T cells (Tfh cells) provide key B cell help, and are essential in germinal  
24 center (GC) formation and (auto) antibody generation. To gain more insight into their role during the  
25 earliest phase of rheumatoid arthritis (RA) we analyzed their frequencies, phenotype and cytokine  
26 profile in peripheral blood and lymphoid tissues.

27 **Methods:** Using flow cytometry, we studied the frequency of Tfh and B cells in peripheral blood and  
28 lymph node (LN) needle biopsies. Three donor groups were included and compared: healthy controls  
29 (HCs), autoantibody positive individuals at risk for developing RA (RA-risk individuals), and early  
30 RA patients. *Ex vivo* stimulation of lymphocytes with PMA/ionomycin was performed to assess  
31 cytokine secretion by Tfh cells.

32 **Results:** In blood, the frequency of circular Tfh cells (cTfh) did not differ between study groups. In  
33 lymphoid tissue, the frequency of Tfh cells correlated strongly with the frequency of CD19<sup>+</sup> B cells.  
34 Compared to healthy controls, LN samples of RA patients and RA-risk individuals showed more  
35 CD19<sup>+</sup> B cells and more CD4<sup>+</sup>CXCR5<sup>+</sup> and CD8<sup>+</sup>CXCR5<sup>+</sup> Tfh cells. These Tfh cells from LNs  
36 expressed less IL-21 upon *ex vivo* stimulation.

37 **Conclusion:** LN tissue of early RA patients as well as part of RA-risk individuals exhibit increased  
38 frequencies of Tfh cells correlating with increased numbers of B cells. Interestingly, IL-21 production  
39 is already aberrant in the very early at risk phase of the disease. This suggests that Tfh cells may present  
40 a novel rationale for therapeutic targeting during the preclinical stage of the disease to prevent further  
41 disease progression.

42

## 43 INTRODUCTION

44 The presence of autoantibodies years before the presence of clinical signs and symptoms in rheumatoid  
45 arthritis (RA) suggest an increase in B cell differentiation towards antibody-producing plasma cells  
46 already very early in the disease (1). Such proliferation and differentiation of B cells is supported by  
47 CD4<sup>+</sup> follicular T helper cells (Tfh cells) (2). These Tfh cells derive from naïve CD4<sup>+</sup> T cells.  
48 Following TCR stimulation under the influence of receptor-ligand interactions and cytokine milieu, T  
49 cells may upregulate CXCR5, causing them to migrate to the CXCL13 expressing follicular border  
50 where they interact with B-cells and receive signals that will potentially drive them into Tfh cells (3).  
51 Producing cytokines like IL-21 and IL-4, Tfh cells interact with B cells which results in B-cell  
52 differentiation towards short-lived plasmablasts or in B-cell migration into the follicles to contribute  
53 to the formation of germinal centers (GC) (4). Migration of Tfh cells into the B-cell follicles further  
54 supports GC formation and drives B-cell differentiation into memory B-cells or long-lived antibody-  
55 secreting plasma cells. Overall, the net effect of this process depends on the balance between  
56 inflammatory and regulatory signals and is tightly regulated to prevent aberrant (auto)immune  
57 activation (5).

58 One of the studies showing the contribution of CD4<sup>+</sup> Tfh cells in autoimmunity used the sanroque  
59 mouse model. Sanroque mice lack a repressor of ICOS, Roquin, resulting in excessive Tfh cell  
60 formation and subsequent GC formation. These mice have increased titres of autoantibodies and lupus-  
61 like symptoms (6). In human studies, SLE patients also show increased frequencies of blood Tfh cells  
62 compared with healthy controls (HCs) which correlate with an increase in circulating autoantibodies  
63 (7-10). Similarly, increased frequencies of peripheral blood Tfh cells have been detected in type I  
64 diabetes and RA patients (11-15). Since Tfh cells can leave the lymphoid tissues and relocate through  
65 peripheral blood they may contribute to B-cell differentiation and formation of tertiary lymphoid  
66 structures at sites of inflammation.

67 While the role of CD4<sup>+</sup> Tfh cells in autoimmunity is widely accepted, current data regarding a potential  
68 role for CD8<sup>+</sup>CXCR5<sup>+</sup> follicular-like T cells are less clear, and actually point to a dual role. Like CD4<sup>+</sup>  
69 Tfh cells, CD8<sup>+</sup> Tfh cells express CXCR5, BCL6, IL-21, ICOS as well as PD-1(16-18). An ex vivo  
70 study reported the ability of CD8<sup>+</sup> CXCR5<sup>+</sup> T cells to induce the apoptosis of CD4<sup>+</sup> Tfh cells, resulting  
71 in inhibition of IL-21 production (19). However, an antibody-enhancing function of these cells has also  
72 been reported in virus-infected mice where IL-21 producing CXCR5<sup>+</sup>ICOSL<sup>+</sup>CD8<sup>+</sup> T cells were shown  
73 to enhance the production and class-switching of IgG antibodies, revealing a major role of CD8<sup>+</sup> Tfh  
74 cells in the immune response (20).

75 Studies into the role of T cells in the pathogenesis of RA in humans have mainly focused on the well-  
76 known Th1, Th2, Th17, and Treg subsets (21-23), during established disease, and in cell populations  
77 from peripheral blood and inflamed joints (22, 24). Studies of Tfh cells focused on peripheral blood  
78 samples or inflamed tissue (4, 25-27), while studies investigating Tfh cells in lymphoid organs during  
79 the earliest phases of autoimmunity are lacking. To the best of our knowledge, no study has analysed  
80 CD8<sup>+</sup> Tfh during the various stages of RA. To gain more insight into the initial activation of Tfh cells  
81 in lymphoid tissue and in the role of lymph node Tfh cells during the earliest phases of RA, more  
82 research is needed.

83 In this study, we hypothesized that Tfh cells contribute to autoantibody production in the earliest  
84 preclinical phases of RA by driving B cell differentiation in secondary lymphoid organs. Using samples  
85 acquired by core-needle biopsies of inguinal LNs (28, 29), we analysed and compared the frequencies  
86 of CD4<sup>+</sup> and CD8<sup>+</sup> Tfh cells in the blood and lymphoid tissue from healthy controls (HCs),  
87 autoantibody-positive individuals at risk for developing RA (RA-risk individuals) and early RA  
88 patients (30).

89

## 90 **MATERIALS AND METHODS**

### 91 *Study subjects*

92 Twenty-four individuals at risk for developing RA (RA-risk) were selected. RA-risk status was defined  
93 by the presence of IgM rheumatoid factor (IgM-RF) and/or anti-citrullinated protein antibodies  
94 (ACPA) positive) in subjects without any evidence of arthritis (30). The median follow-up time was  
95 26.8 months (14.3-39.2 (interquartile range, IQR)) and none of these RA-risk individuals had  
96 developed arthritis as yet. We also included 16 early RA patients, based on American College of  
97 Rheumatology and European League Against Rheumatism (ACR/EULAR) 2010 criteria (31), who  
98 were naïve for disease-modifying antirheumatic drugs (DMARD) and biologicals with a disease  
99 duration (defined by having arthritis in any joint) less than 1 year. For comparison, 17 seronegative  
100 healthy controls (HCs) were included in the study. The study was performed according to the principles  
101 of the Declaration of Helsinki (32), approved by the institutional review board of the Academic  
102 Medical Centre of the University of Amsterdam, and all study subjects gave written informed consent.  
103 Demographics of all study subjects are listed in table 1.

104

### 105 *Sample processing and cell culture*

106 Ultrasound-guided inguinal LN biopsies were taken and immediately processed for flow cytometry  
107 analysis, snap-frozen en bloc in Tissue-Tek OCT compound (Miles, Elkhart, IN) for  
108 immunohistochemistry analysis or snap frozen for RNA isolation as described previously (28). For  
109 flow cytometry analyses, LN biopsies were put through a 70 µm cell strainer (BD Falcon, San Jose,  
110 CA) to obtain a single cell suspension. Peripheral blood mononuclear cells (PBMC) were isolated using  
111 standard density gradient centrifugation using lymphoprep (Nycomed AS, Oslo, Norway) and stored

112 in liquid nitrogen until further use. Freshly isolated LN cells and thawed PBMC were incubated in  
113 RPMI culture medium (Life Technologies, Thermo Fisher Scientific Inc., Waltham, MA) for 4 hours  
114 in the presence or absence of Phorbol Myristate Acetate (PMA) and Ionomycine with Brefeldin A (all  
115 from Sigma Aldrich, St Louis, MO) and Golgi stop (BD Biosciences, San Jose, CA). After 4 hours,  
116 cells were washed and analyzed by flow cytometry.

117

### 118 *Antibodies and flow cytometry analysis*

119 Cells were stained for 30 minutes at 4<sup>0</sup>C in PBS containing 0.01% NaN<sub>3</sub> and 0.5% BSA (Sigma  
120 Aldrich) with directly labelled antibodies against: CXCR5 alexa fluor 488 (clone RF8B2), CCR7 PE-  
121 Cy7 (clone 3D12), CD4 APC-H7 (clone SK3), CD8 V450 (RPA-T8), CD3 V500 (UCHT1) (all from  
122 BD Biosciences, San Jose, CA), PD-1 PE (J105), CD45 RA (L307.4) efluor450 (all from eBioscience  
123 Inc., San Diego, CA). For intracellular cytokine staining we used IL-10 Pe-Cy7 (clone JES3-9D7)  
124 (Biolegend, San Diego, CA) and IL-21 alexa fluor 647 (clone 3A3-N2.1) (BD Biosciences). Cells were  
125 analyzed on a FACS Canto II (BD Biosciences) and data were analyzed using FlowJo software  
126 (FlowJo, Ashland, OR). Data were plotted as frequency of positive cells.

127

### 128 *Statistical analysis*

129 After testing for normality with D'Agostino and Pearson omnibus test, data are presented as mean with  
130 standard deviation or median with IQR. Differences between groups were analysed using the Kruskal  
131 Wallis test or one-way analysis of variances (ANOVA). Correlations were calculated with Spearman's  
132 Rank Correlation Coefficient. All statistical analyses were performed using GraphPad Prism Software

133 (version 6, GraphPad Software, Inc. La Jolla, CA). P-values <0.05 were considered statistically  
134 significant.

135

## 136 **RESULTS**

137 *The frequency of peripheral blood CD4<sup>+</sup> and CD8<sup>+</sup> circulating follicular helper T cells is comparable*  
138 *between healthy controls, RA-risk individuals and early RA patients*

139 To analyse the frequency of peripheral blood CD4<sup>+</sup> and CD8<sup>+</sup> cTfh cells in HCs, RA-risk individuals  
140 and early RA patients we first analysed the total number of CXCR5<sup>+</sup> and PD-1<sup>+</sup> cells within the CD4<sup>+</sup>  
141 and CD8<sup>+</sup> T cells (see gating Figure 1A and supplementary figure 1 (negative control)). The  
142 frequencies of CD4<sup>+</sup>CXCR5<sup>+</sup> and CD4<sup>+</sup>PD-1<sup>+</sup> T cells as well as CD8<sup>+</sup>CXCR5<sup>+</sup> and CD8<sup>+</sup>PD-1<sup>+</sup> T cells  
143 were on average comparable between the three study groups (Figures 1B and C). Within the  
144 CD4<sup>+</sup>CXCR5<sup>+</sup> T cell subset, the CCR7<sup>low</sup>PD1<sup>high</sup> cells have been described as active Tfh cells and the  
145 CCR7<sup>high</sup>PD1<sup>low</sup> as quiescent Tfh cells (14). In our analysis the frequency of active (CCR7<sup>low</sup>PD-1<sup>high</sup>  
146 ) and quiescent (CCR7<sup>high</sup>PD-1<sup>lo</sup>) cTfh cells within the blood CD4<sup>+</sup>CXCR5<sup>+</sup> and CD8<sup>+</sup>CXCR5<sup>+</sup> cells  
147 was comparable between the three study groups (Figures 1D and E). No significant correlations  
148 between the frequencies of various cTfh cells were present with age or autoantibodies detected in blood  
149 (data not shown).

150 Next we analyzed the capacity for cytokine production in blood cTfh cells upon ex vivo stimulation  
151 with PMA/ionomycin. The frequency of CD4<sup>+</sup>CXCR5<sup>+</sup>IL-21<sup>+</sup>, CD4<sup>+</sup>CXCR5<sup>+</sup>IL-10<sup>+</sup>,  
152 CD8<sup>+</sup>CXCR5<sup>+</sup>IL-21<sup>+</sup> and CD8<sup>+</sup>CXCR5<sup>+</sup>IL-10<sup>+</sup> T cells was on average comparable between the three  
153 study groups (Figures 1F and G). As expected, the frequency of peripheral blood active-Tfh cells  
154 producing IL-21 is higher than the frequency of quiescent-Tfh cells. Finally, the frequency of IL-21<sup>+</sup>

155 cells among active  $CD4^+CXCR5^+CCR7^{low}PD-1^{high}$  and  $CD8^+CXCR5^+CCR7^{low}PD-1^{high}$  was on  
156 average comparable between the three study groups (Figure 1H).

157 Taken together, the frequency of blood  $CD4^+$  and  $CD8^+$  cTfh cells is highly variable but on average  
158 not different between RA-risk individuals and early RA patients compared with healthy controls (HCs).

159

### 160 *CD4<sup>+</sup> and CD8<sup>+</sup> follicular helper T cells are increased in lymphoid tissue of RA patients*

161 Next, we analysed the frequencies of  $CD4^+$  and  $CD8^+$  Tfh cells based on CXCR5 expression in LN  
162 biopsies (see gating Figure 2A). CXCR5 expression defines LN T cells that are capable of moving  
163 towards the follicular border where they can interact with B cells (2). Among  $CD3^+$  T cells, the  
164 frequency of total  $CD4^+$  T cells was not significantly higher in RA-risk individuals compared to HCs,  
165 but significantly increased in early RA individuals compared to HCs (Figure 2B). Among  $CD4^+$  T cells  
166 the frequency of  $CXCR5^+$  Tfh cells is increased in early RA patients compared with HCs (Figure 2B;  
167  $p<0.05$ ), while frequencies in RA at-risk individuals are in between. We next evaluated the frequencies  
168 of  $CD8^+$  T cells. Among  $CD3^+$  cells, the frequency of  $CD8^+$  T cells was similar between RA-risk  
169 individuals and HCs, while it was significantly lower in early RA patients compared to HCs (Figure  
170 2C). Among  $CD8^+$  T cells, the frequency of  $CD8^+CXCR5^+$  Tfh cells was markedly increased ( $p<0.05$ )  
171 in RA-risk individuals as well as early RA patients when compared to HCs (Figure 2C).

172 Since IL-21 and IL-10 production was below detection limit in unstimulated cells, we analysed IL-21  
173 and IL-10 production in LN  $CD4^+CXCR5^+$  and  $CD8^+CXCR5^+$  Tfh cells upon ex vivo stimulation with  
174 PMA/ionomycin. Among  $CD4^+CXCR5^+$  Tfh cells, the frequency of IL-21 producing cells upon ex  
175 vivo stimulation was significantly decreased in early RA patients ( $p<0.01$ ) when compared with HCs,  
176 while the frequency was intermediate for the RA-risk individuals (Figure 2D). Similar findings were



177 observed for CD8<sup>+</sup>CXCR5<sup>+</sup> Tfh cells, but without reaching statistical significance (Figure 2D). In  
178 contrast, the frequency of IL-10 producers in the CD4<sup>+</sup> and CD8<sup>+</sup> CXCR5<sup>+</sup> Tfh cells was comparable  
179 between the three study groups (Figure 2E).

180

181 *In lymphoid tissue, the frequencies of CD4<sup>+</sup> and CD8<sup>+</sup> follicular helper T cells correlate with the*  
182 *frequencies of CD19<sup>+</sup> B cells*

183 Since CD4<sup>+</sup>CXCR5<sup>+</sup> and CD8<sup>+</sup>CXCR5<sup>+</sup> Tfh cells were increased in LNs of RA patients compared to  
184 HCs, we investigated if they were in any way related to the frequencies of B cells found in LNs.  
185 Consistent with previous findings (29), the frequency of CD19<sup>+</sup> B cells was increased in early RA  
186 patients compared with healthy controls (p<0.05) but similar between healthy controls and RA-risk  
187 individuals (Figure 3A). When compared with CD4<sup>+</sup>CXCR5<sup>+</sup> Tfh cells, we found a strong and  
188 significant correlation between the frequencies of CD19<sup>+</sup> B cells and CD4<sup>+</sup>CXCR5<sup>+</sup> Tfh cells  
189 (p<0.0001, r=0.76) (Figure 3B). Interestingly, we also observed a significant and strong correlation  
190 (p<0.0004, r=0.62) between CD8<sup>+</sup>CXCR5<sup>+</sup> Tfh cells with CD19<sup>+</sup> B cells in LN (Figure 3C). Taken  
191 together, the frequencies of CD4<sup>+</sup>CXCR5<sup>+</sup> and CD8<sup>+</sup>CXCR5<sup>+</sup> Tfh cells strongly correlate with the  
192 frequencies of CD19<sup>+</sup> B cells localised within LNs.

193

194

## 195 **DISCUSSION**

196 We studied CD4<sup>+</sup> and CD8<sup>+</sup> Tfh cells in both LN biopsies and peripheral blood samples obtained  
197 during the earliest phases of RA and compared our findings to control samples. We found an increased  
198 frequency of CD4<sup>+</sup>CXCR5<sup>+</sup> follicular helper T cells and CD19<sup>+</sup> B cells in lymphoid tissue of early RA

199 patients, and CD8<sup>+</sup>CXCR5<sup>+</sup> Tfh cells was similarly increased in LN tissue of both RA-risk individuals  
200 and RA patients. This increased frequency of B cells in LNs of RA patients compared to healthy  
201 controls is in accordance with previous reports (29, 33). A plausible explanation behind this increase  
202 could be the retention of B cells in lymphoid tissue where they eventually differentiate into various B  
203 cell effector phenotypes and contribute to disease development. In LN biopsies the frequencies of  
204 CD4<sup>+</sup>CXCR5<sup>+</sup> and CD8<sup>+</sup>CXCR5<sup>+</sup> Tfh cells correlate significantly with the frequency of CD19<sup>+</sup> B cells  
205 suggesting an increased number of B and T cells that can possibly interact at the LN follicular border  
206 and drive immune responses. In mice, the location of CD4<sup>+</sup> Tfh cells inside the LN during primary and  
207 memory responses has been studied in detail (34). During the primary immune response CD4<sup>+</sup> Tfh  
208 cells are located in the GC follicle, while for a memory response CD4<sup>+</sup> Tfh cells are located in the sub  
209 capsular region and can leave the follicle via the lymphatic flow. This enables CD4<sup>+</sup> Tfh cells to  
210 migrate through blood towards other secondary lymphoid organs or inflamed tissues where they can  
211 initiate new GC responses if the antigen is present (14). These migrating CD4<sup>+</sup> Tfh cells in blood can  
212 be present before differentiation towards a fully mature effector Tfh phenotype (35). In our study, the  
213 frequency of active and quiescent CD4<sup>+</sup> Tfh cells in blood was not significantly altered in RA and RA-  
214 risk individuals compared with HCs.

215 CD8<sup>+</sup> T cells often function as an effector cytotoxic T cell type hence, they were assumed to be  
216 excluded from entry into B cell follicles and participation in GC reactions (36, 37). However, recent  
217 data suggest that CD8<sup>+</sup> T cells like their CD4<sup>+</sup> counterpart are able to acquire CXCR5 which enables  
218 their migration into B cell follicles and subsequently eliminate virus infected B cells as well as CD4<sup>+</sup>  
219 Tfh cells (19). Our findings on the presence and increased frequency of CD8<sup>+</sup> Tfh cells in lymphoid  
220 tissues of early RA patients confirm the presence of CD8<sup>+</sup> Tfh cells in lymphoid structures. A study by  
221 Kang *et al* was among the first to report the presence of CD8<sup>+</sup> T cells in ectopic lymphoid follicles in  
222 joints of RA patients (38). In addition, a recent study reported an increased frequency of

223 CD8<sup>+</sup>CXCR5<sup>+</sup>PD1<sup>+</sup> Tfh cells in LN tissues of IL-2 knock-out mice which were shown to secrete IL-  
224 21 and promote B cell antibody class-switching. Interestingly, these CD8<sup>+</sup> T follicular cells continued  
225 to expand in terms of frequency and numbers over time in these mice (20). Although we did not  
226 investigate the B cell class-switching potential of the observed lymph node CD8<sup>+</sup> Tfh cells, their  
227 frequency correlated with the numbers of B cells. Human studies are needed to further unravel the  
228 potential of these cells to participate in a typical GC reaction such as B cell selection.

229 Even though Tfh cells are thought to be crucial for B differentiation within GCs, a recent study  
230 identified another type of B-cell promoting T helper cell in peripheral blood and synovial tissue  
231 expressing high levels of PD-1 while negative for CXCR5 (26). These cells, identified as peripheral  
232 helper cells (Tph), express factors like IL-21, CXCL13 and ICOS enabling them to provide B cell help  
233 and drive B cell differentiation. Further characterisation of Tph and Tfh cells in lymphoid tissues as  
234 well as inflamed synovial tissue is of interest to understand the mechanisms leading to the formation  
235 of secondary and tertiary lymphoid structures and subsequent autoimmune responses.

236 Similar to previous findings of decreased production of pro-inflammatory cytokines upon ex vivo  
237 stimulation of LN T cells of early RA patients (39, 40), we found decreased production of IL-21 in LN  
238 Tfh cells of early RA patients and in part of the RA-risk individuals. This decreased production of IL-  
239 21 by CD4<sup>+</sup>CXCR5<sup>+</sup> and CD8<sup>+</sup>CXCR5<sup>+</sup> Tfh cells could be a consequence of prolonged antigen  
240 stimulation and exposure *in vivo*, resulting in an exhausted phenotype of these cells (41). Interestingly  
241 and in accordance with previous reports (39), this phenomenon of decreased IL-21 production by T  
242 cells in our study was only observed in LNs but not in peripheral blood. Our results further highlight  
243 the possibility that LNs may offer a unique environment that influences the function and phenotype of  
244 T cells resulting in disease development. Therefore, future work aimed at unraveling the possibility of  
245 follicular helper T cell exhaustion in lymphoid structures is needed. While IL-21 is described as the  
246 most important cytokine derived from Tfh cells to promote B-cell differentiation and proliferation, Tfh

247 cells also produce other cytokines like IL-4 and IFN- $\gamma$ . Indeed, an *in vitro* study using sorted  
248 CD4<sup>+</sup>CXCR5<sup>+</sup> blood Tfh cells from healthy controls (HCs) and chronic hepatitis C infected patients  
249 (HCV) showed that Tfh cells from HCV patients produce less IL-21 but are equally capable of driving  
250 *in vitro* B cell proliferation and differentiation into antibody producing cells compared with healthy  
251 control cells (42). This indicates that B-cell differentiation is not solely dependent on large amounts of  
252 IL-21. Another explanation for low *ex vivo* IL-21 production may be that primary immune responses  
253 are depending on IL-21 but that secondary memory responses of Tfh cells are not (42, 43).

254 Even though the number of participants in our study is limited, the data presented here show for the  
255 first time the relation between the number of Tfh cells and B cells inside human LN biopsies and  
256 increased frequencies of CD4<sup>+</sup> and CD8<sup>+</sup> Tfh cells in LN biopsies of early RA patients. Since Tfh may  
257 amplify B-cell responses and autoantibody production in lymphoid tissue and CD8<sup>+</sup> Tfh are already  
258 increased in RA-risk individuals, targeting Tfh cells early could be tested as a new approach to prevent  
259 further disease progression during the earliest phases of RA.

260

## 261 **Acknowledgements**

262 We thank the study participants in the study, the radiology department at the Academic  
263 Medical Center (AMC) for lymph node sampling; the flow cytometry facility at the Hematology  
264 department at AMC, especially J.A. Dobber; and the core facility Cellular Imaging of the Amsterdam  
265 UMC, location AMC.

266

267

268

269 **Author contributions:**

270 Study conception and design: LGB, DMG, PPT. Acquisition of data: THR, JH, BK, NS, KPL, MM.  
271 Analysis and interpretation of data: THR, DCA, PPT, DMG, NdV, LGB. All authors revised the article  
272 for important intellectual content and all authors have read and approved the final version of the  
273 manuscript. Dr. van Baarsen had full access to all of the data in the study and takes responsibility for  
274 the integrity of the data and the accuracy of the data analysis.

275

276 **Conflict of Interest**

277 The authors declare that the research was conducted in the absence of any commercial or financial  
278 relationships that could be construed as a potential conflict of interest.

279

280 **Funding**

281 The study was supported by COmbatting disorders of adaptive immunity with Systems MedICine  
282 (COSMIC) that has received funding from the European Union's Horizon 2020 research and  
283 innovation program under the Marie Skłodowska-Curie grant agreement No. 765158. This study was  
284 also supported by the Innovative Medicines Initiative (IMI) EU-funded project BeTheCure (nr115142),  
285 Euro-TEAM FP7 HEALTH program under the grant agreement FP7-HEALTH-F2-2012-305549,  
286 Dutch Arthritis Foundation grant 11-1-308, and the Netherlands Organisation for Health Research and  
287 Development (ZonMw) Veni project 916.12.109.

288

289

290 **References**

- 291 1. Rantapaa-Dahlqvist S, de Jong BA, Berglin E, Hallmans G, Wadell G, Stenlund H, et al.  
292 Antibodies against cyclic citrullinated peptide and IgA rheumatoid factor predict the development of  
293 rheumatoid arthritis. *Arthritis Rheum.* 2003;48(10):2741-9.
- 294 2. Crotty S. Follicular helper CD4 T cells (TFH). *Annu Rev Immunol.* 2011;29:621-63.
- 295 3. Patakas A, Platt AM, Butcher JP, Maffia P, McInnes IB, Brewer JM, et al. Putative existence  
296 of reciprocal dialogue between Tfh and B cells and its impact on infectious and autoimmune disease.  
297 *Immunol Lett.* 2011;138(1):38-46.
- 298 4. Anang DC, Balzaretto G, van Kampen A, de Vries N, Klarenbeek PL. The Germinal Center  
299 Milieu in Rheumatoid Arthritis: The Immunological Drummer or Dancer? *International Journal of*  
300 *Molecular Sciences.* 2021;22(19):10514.
- 301 5. Alexander CM, Tygrett LT, Boyden AW, Wolniak KL, Legge KL, Waldschmidt TJ. T  
302 regulatory cells participate in the control of germinal centre reactions. *Immunology.* 2011;133(4):452-  
303 68.
- 304 6. Vinuesa CG, Cook MC, Angelucci C, Athanasopoulos V, Rui L, Hill KM, et al. A RING-type  
305 ubiquitin ligase family member required to repress follicular helper T cells and autoimmunity. *Nature.*  
306 2005;435(7041):452-8.
- 307 7. Xu H, Liu J, Cui X, Zuo Y, Zhang Z, Li Y, et al. Increased frequency of circulating follicular  
308 helper T cells in lupus patients is associated with autoantibody production in a CD40L-dependent  
309 manner. *Cell Immunol.* 2015;295(1):46-51.
- 310 8. Zhang X, Lindwall E, Gauthier C, Lyman J, Spencer N, Alarakhia A, et al. Circulating  
311 CXCR5+CD4+helper T cells in systemic lupus erythematosus patients share phenotypic properties  
312 with germinal center follicular helper T cells and promote antibody production. *Lupus.* 2015.

- 313 9. Hutloff A, Buchner K, Reiter K, Baelde HJ, Odendahl M, Jacobi A, et al. Involvement of  
314 inducible costimulator in the exaggerated memory B cell and plasma cell generation in systemic lupus  
315 erythematosus. *Arthritis and rheumatism*. 2004;50(10):3211-20.
- 316 10. Simpson N, Gatenby PA, Wilson A, Malik S, Fulcher DA, Tangye SG, et al. Expansion of  
317 circulating T cells resembling follicular helper T cells is a fixed phenotype that identifies a subset of  
318 severe systemic lupus erythematosus. *Arthritis and rheumatism*. 2010;62(1):234-44.
- 319 11. Arroyo-Villa I, Bautista-Caro MB, Balsa A, Aguado-Acin P, Bonilla-Hernan MG, Plasencia C,  
320 et al. Constitutively altered frequencies of circulating follicular helper T cell counterparts and their  
321 subsets in rheumatoid arthritis. *Arthritis Res Ther*. 2014;16(6):500.
- 322 12. Ferreira RC, Simons HZ, Thompson WS, Cutler AJ, Dopico XC, Smyth DJ, et al. IL-21  
323 production by CD4<sup>+</sup> effector T cells and frequency of circulating follicular helper T cells are increased  
324 in type 1 diabetes patients. *Diabetologia*. 2015;58(4):781-90.
- 325 13. Ma J, Zhu C, Ma B, Tian J, Baidoo SE, Mao C, et al. Increased frequency of circulating  
326 follicular helper T cells in patients with rheumatoid arthritis. *Clin Dev Immunol*. 2012;2012:827480.
- 327 14. He J, Tsai LM, Leong YA, Hu X, Ma CS, Chevalier N, et al. Circulating precursor  
328 CCR7(lo)PD-1(hi) CXCR5(+) CD4(+) T cells indicate Tfh cell activity and promote antibody  
329 responses upon antigen reexposure. *Immunity*. 2013;39(4):770-81.
- 330 15. Liu R, Wu Q, Su D, Che N, Chen H, Geng L, et al. A regulatory effect of IL-21 on T follicular  
331 helper-like cell and B cell in rheumatoid arthritis. *Arthritis Res Ther*. 2012;14(6):R255.
- 332 16. Quigley MF, Gonzalez VD, Granath A, Andersson J, Sandberg JK. CXCR5<sup>+</sup> CCR7<sup>-</sup> CD8<sup>+</sup> T  
333 cells are early effector memory cells that infiltrate tonsil B cell follicles. *European Journal of*  
334 *Immunology*. 2007;37(12):3352-62.
- 335 17. He R, Hou S, Liu C, Zhang A, Bai Q, Han M, et al. Follicular CXCR5<sup>-</sup> expressing CD8<sup>+</sup> T  
336 cells curtail chronic viral infection. *Nature*. 2016;537(7620):412-28.

- 337 18. Leong YA, Chen Y, Ong HS, Wu D, Man K, Deleage C, et al. CXCR5(+) follicular cytotoxic  
338 T cells control viral infection in B cell follicles. *Nature immunology*. 2016;17(10):1187-96.
- 339 19. Miles B, Miller SM, Folkvord JM, Levy DN, Rakasz EG, Skinner PJ, et al. Follicular  
340 Regulatory CD8 T Cells Impair the Germinal Center Response in SIV and Ex Vivo HIV Infection.  
341 *PLoS pathogens*. 2016;12(10):e1005924.
- 342 20. Valentine KM, Davini D, Lawrence TJ, Mullins GN, Manansala M, Al-Kuhlani M, et al. CD8  
343 Follicular T Cells Promote B Cell Antibody Class Switch in Autoimmune Disease. *J Immunol*.  
344 2018;201(1):31-40.
- 345 21. Raza K, Falciani F, Curnow SJ, Ross EJ, Lee CY, Akbar AN, et al. Early rheumatoid arthritis  
346 is characterized by a distinct and transient synovial fluid cytokine profile of T cell and stromal cell  
347 origin. *Arthritis Res Ther*. 2005;7(4):R784-95.
- 348 22. Cope AP. T cells in rheumatoid arthritis. *Arthritis Res Ther*. 2008;10 Suppl 1:S1.
- 349 23. Alzabin S, Williams RO. Effector T cells in rheumatoid arthritis: lessons from animal models.  
350 *FEBS Lett*. 2011;585(23):3649-59.
- 351 24. Smeets TJ, Dolhain R, Miltenburg AM, de Kuiper R, Breedveld FC, Tak PP. Poor expression  
352 of T cell-derived cytokines and activation and proliferation markers in early rheumatoid synovial  
353 tissue. *Clin Immunol Immunopathol*. 1998;88(1):84-90.
- 354 25. Ueno H. T follicular helper cells in human autoimmunity. *Curr Opin Immunol*. 2016;43:24-31.
- 355 26. Rao DA, Gurish MF, Marshall JL, Slowikowski K, Fonseka CY, Liu Y, et al. Pathologically  
356 expanded peripheral T helper cell subset drives B cells in rheumatoid arthritis. *Nature*.  
357 2017;542(7639):110-4.
- 358 27. Su R, Wang Y, Hu F, Li B, Guo Q, Zheng X, et al. Altered Distribution of Circulating T  
359 Follicular Helper-Like Cell Subsets in Rheumatoid Arthritis Patients. *Frontiers in Medicine*.  
360 2021;8(1024).



- 361 28. de Hair MJ, Zijlstra IA, Boumans MJ, van de Sande MG, Maas M, Gerlag DM, et al. Hunting  
362 for the pathogenesis of rheumatoid arthritis: core-needle biopsy of inguinal lymph nodes as a new  
363 research tool. *Ann Rheum Dis.* 2012;71(11):1911-2.
- 364 29. van Baarsen LG, de Hair MJ, Ramwadhoebe TH, Zijlstra IJ, Maas M, Gerlag DM, et al. The  
365 cellular composition of lymph nodes in the earliest phase of inflammatory arthritis. *Ann Rheum Dis.*  
366 2013;72(8):1420-4.
- 367 30. Gerlag DM, Raza K, van Baarsen LG, Brouwer E, Buckley CD, Burmester GR, et al. EULAR  
368 recommendations for terminology and research in individuals at risk of rheumatoid arthritis: report  
369 from the Study Group for Risk Factors for Rheumatoid Arthritis. *Ann Rheum Dis.* 2012;71(5):638-41.
- 370 31. Kay J, Upchurch KS. ACR/EULAR 2010 rheumatoid arthritis classification criteria.  
371 *Rheumatology (Oxford).* 2012;51 Suppl 6:vi5-9.
- 372 32. Association WM. World Medical Association Declaration of Helsinki: Ethical Principles for  
373 Medical Research Involving Human Subjects. *JAMA.* 2013;310(20):2191-4.
- 374 33. Li J, Kuzin I, Moshkani S, Proulx ST, Xing L, Skrombolas D, et al. Expanded  
375 CD23(+)/CD21(hi) B cells in inflamed lymph nodes are associated with the onset of inflammatory-  
376 erosive arthritis in TNF-transgenic mice and are targets of anti-CD20 therapy. *J Immunol.*  
377 2010;184(11):6142-50.
- 378 34. Suan D, Nguyen A, Moran I, Bourne K, Hermes JR, Arshi M, et al. T follicular helper cells  
379 have distinct modes of migration and molecular signatures in naive and memory immune responses.  
380 *Immunity.* 2015;42(4):704-18.
- 381 35. Tsai LM, Yu D. Follicular helper T-cell memory: establishing new frontiers during antibody  
382 response. *Immunol Cell Biol.* 2014;92(1):57-63.
- 383 36. Mueller SN, Gebhardt T, Carbone FR, Heath WR. Memory T cell subsets, migration patterns,  
384 and tissue residence. *Annu Rev Immunol.* 2013;31:137-61.

- 385 37. Fukazawa Y, Lum R, Okoye AA, Park H, Matsuda K, Bae JY, et al. B cell follicle sanctuary  
386 permits persistent productive simian immunodeficiency virus infection in elite controllers. *Nature*  
387 *medicine*. 2015;21(2):132-9.
- 388 38. Kang Y, Zhang X, Wagner U, Yang H, Beckenbaugh R, Kurtin P, et al. CD8 T Cells Are  
389 Required for the Formation of Ectopic Germinal Centers in Rheumatoid Synovitis. *The Journal of*  
390 *experimental medicine*. 2002;195:1325-36.
- 391 39. Ramwadhoebe TH, Hahnlein J, Maijer KI, van Boven LJ, Gerlag DM, Tak PP, et al. Lymph  
392 node biopsy analysis reveals an altered immunoregulatory balance already during the at-risk phase of  
393 autoantibody positive rheumatoid arthritis. *Eur J Immunol*. 2016;46(12):2812-21.
- 394 40. Hahnlein JS, Nadafi R, de Jong T, Ramwadhoebe TH, Semmelink JF, Maijer KI, et al.  
395 Impaired lymph node stromal cell function during the earliest phases of rheumatoid arthritis. *Arthritis*  
396 *Res Ther*. 2018;20(1):35.
- 397 41. Schietinger A, Greenberg PD. Tolerance and exhaustion: defining mechanisms of T cell  
398 dysfunction. *Trends Immunol*. 2014;35(2):51-60.
- 399 42. Spaan M, Kreefft K, de Graav GN, Brouwer WP, de Kneegt RJ, ten Kate FJ, et al. CD4+  
400 CXCR5+ T cells in chronic HCV infection produce less IL-21, yet are efficient at supporting B cell  
401 responses. *J Hepatol*. 2015;62(2):303-10.
- 402 43. Fairfax KC, Everts B, Amiel E, Smith AM, Schramm G, Haas H, et al. IL-4-secreting secondary  
403 T follicular helper (Tfh) cells arise from memory T cells, not persisting Tfh cells, through a B cell-  
404 dependent mechanism. *J Immunol*. 2015;194(7):2999-3010.

405

406

407

408 **Tables**

**Table 1:** Baseline characteristics of healthy controls (HCs), RA-risk individuals (RA risk) and early RA patients (Early RA)

|                                   | <b>HC</b><br><b>n= 17</b> | <b>RA risk</b><br><b>n=24</b> | <b>Early RA</b><br><b>n= 16</b> |
|-----------------------------------|---------------------------|-------------------------------|---------------------------------|
| Sex, female (%)                   | 11 (65)                   | 20 (83)                       | 9 (56)                          |
| Age (years) <sup>#</sup>          | 38.0 (15.91)              | 48.0 (12.9)                   | 52.0 (14.1)                     |
| IgM-RF positive (n (%))           | 0 (0)                     | 11 (46)                       | 15 (94)                         |
| IgM-RF level (kU/l) <sup>*</sup>  | 3.3 (1.0-15.0)            | 21.0 (6.3-190.3)              | 312.0 (230.0-405.5)             |
| ACPA positive (n (%))             | 0 (0)                     | 15 (63)                       | 15 (94)                         |
| ACPA level (kAU/l) <sup>*</sup>   | 4.0 (2.0-9.0)             | 45.0 (4.3-176.5)              | 388.0 (103.5-1529.5)            |
| IgM-RF and ACPA both pos. (n (%)) | 0 (0)                     | 2 (8)                         | 14 (88)                         |
| ESR (mm/h) <sup>*</sup>           | nd                        | 7.5 (2.0-12.0)                | 13.5 (5.0-27.5)                 |
| CRP (mg/l) <sup>*</sup>           | 0.9 (0.5-2.3)             | 1.9 (0.9-3.8)                 | 7.7 (4.5-13.2)                  |
| 68 TJC (n) <sup>*</sup>           | 0 (0)                     | 2.0 (1.0-3.8)                 | 15.0 (9.8-21.8)                 |
| 66 SJC (n) <sup>*</sup>           | 0 (0)                     | 0 (0)                         | 10.0 (5.0-13.3)                 |

*Categorical variables: n (%). Continuous variables; #, mean with standard deviation (SD); \*, median with interquartile range (IQR); ACPA, anticitrullinated protein antibodies; nd, not determined; ESR, erythrocyte sedimentation rate; CRP, C-reactive protein; IgM-RF, IgM rheumatoid factor; 68 TJC, tender joint count of 68 joints; 66 SJC, swollen joint count of 66 joints.*

409

410

411 FIGURES

412 FIGURE 1

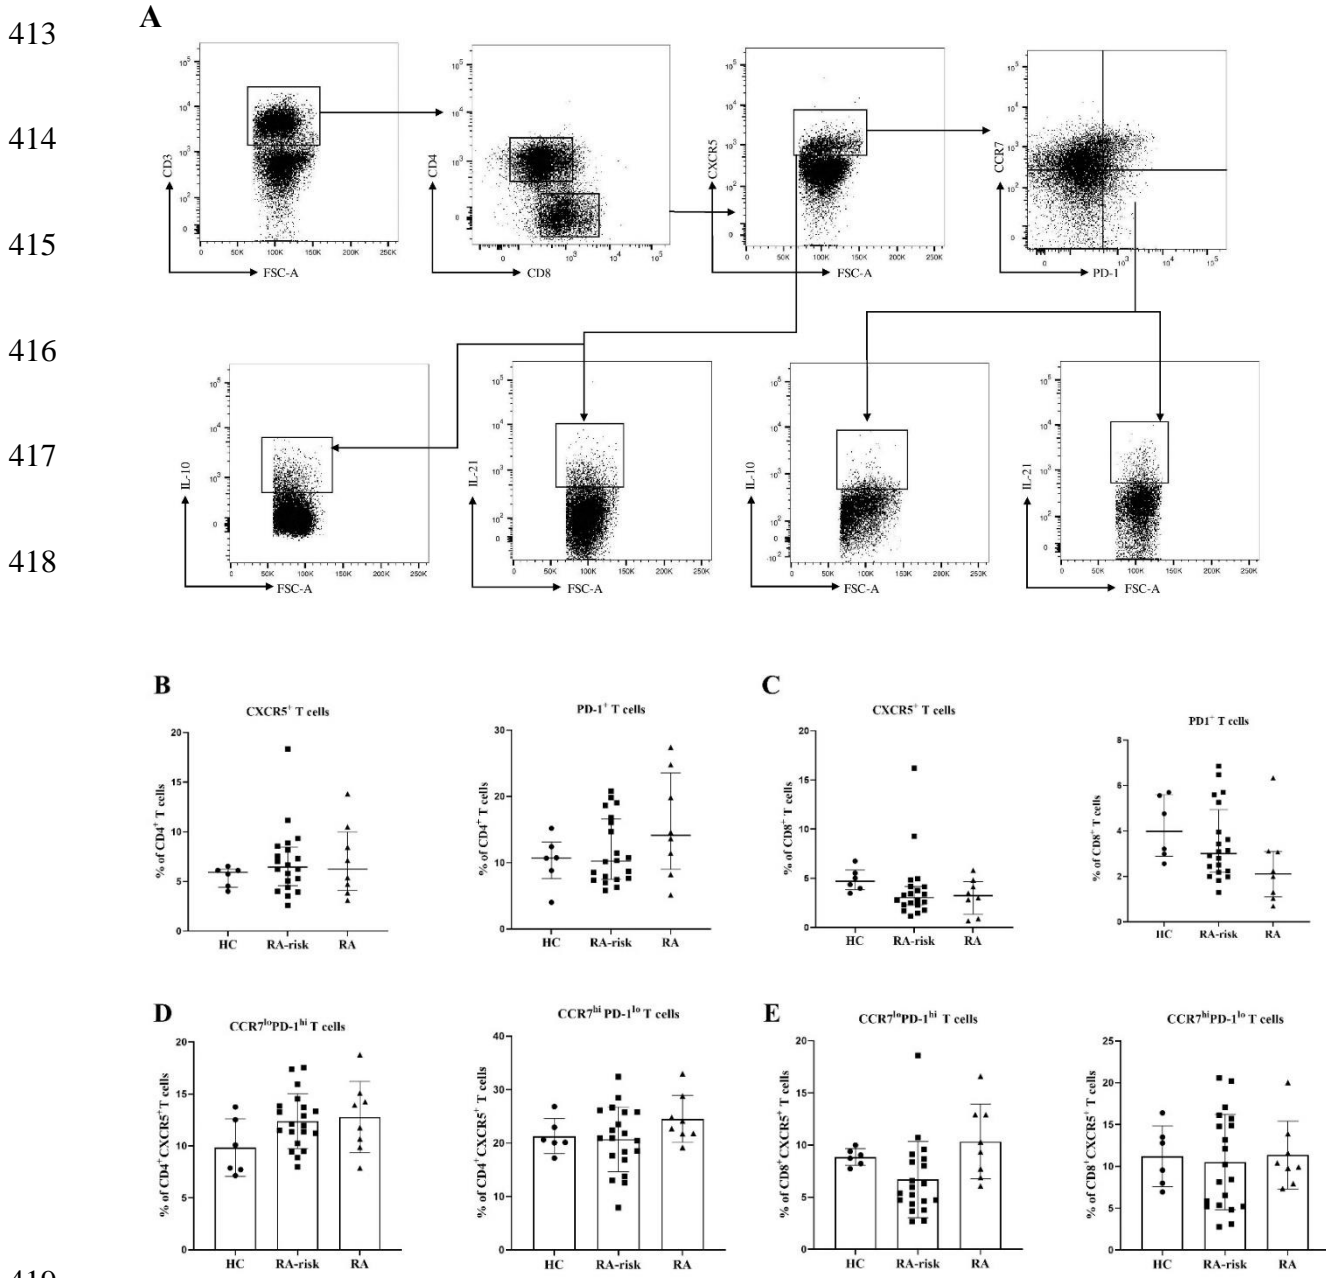

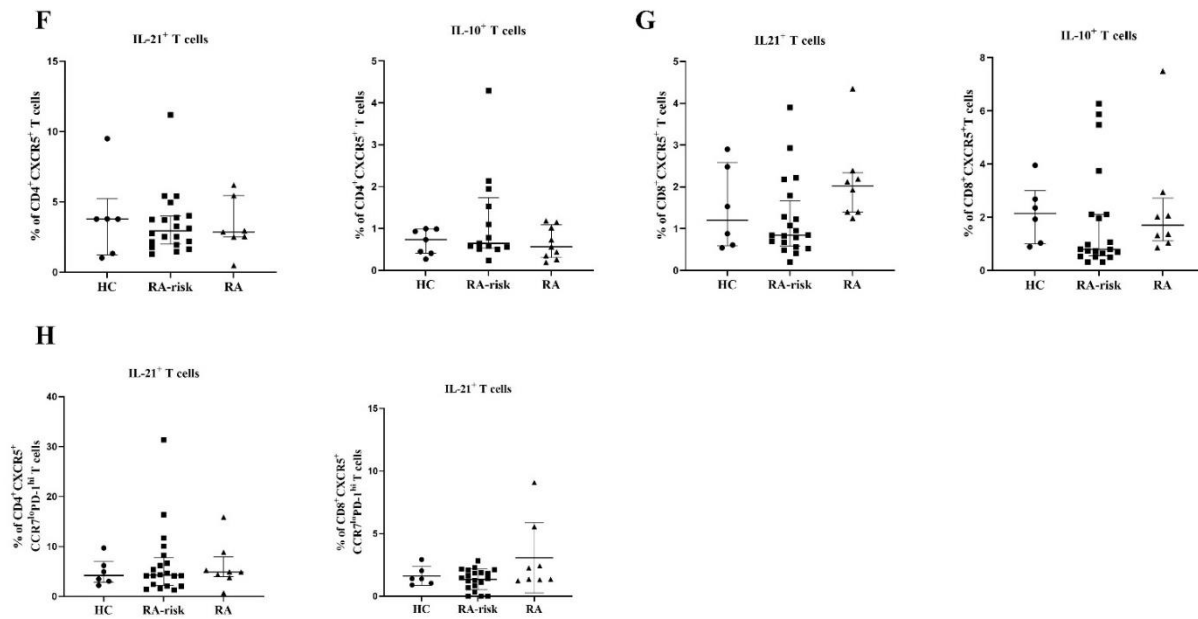

423

424 **Figure 1 | Analysis of circulating follicular helper T cells in peripheral blood samples. (A)** Gating  
 425 strategy for cTfh cells in PBMCs using markers for CD3, CD4, CD8, CXCR5, CCR7, PD-1, IL-21 and  
 426 IL-10. After gating for single cells, CD4<sup>+</sup> and CD8<sup>+</sup> T cells were gated within the CD3<sup>+</sup> population and  
 427 further characterized. **(B, C)** The frequencies of CXCR5<sup>+</sup> and PD-1<sup>+</sup> cells within CD4<sup>+</sup> and CD8<sup>+</sup> T  
 428 cells were analysed in PBMC samples collected from healthy controls (HC n=6), RA-risk individuals  
 429 (RA-risk n=20) and early RA patients (RA n=8). **(D, E)** the frequencies of blood CCR7<sup>low</sup>PD1<sup>high</sup> cTfh  
 430 and CCR7<sup>high</sup>PD1<sup>low</sup> cTfh within the CD4<sup>+</sup>CXCR5<sup>+</sup> and CD8<sup>+</sup>CXCR5<sup>+</sup> populations are plotted. **(F, G,**  
 431 **H)** the frequency of IL-21 and IL-10 producing cells within the indicated T-cell subsets are shown. Not  
 432 normally distributed data are presented as median with IQR and, normally distributed data are  
 433 presented in box plots with error bars representing mean with SD. For statistical analysis Kruskal  
 434 Wallis or one-way ANOVA (when appropriate) was performed. Significant differences were indicated  
 435 as \*p<0.05 or \*\*p<0.01. All symbols represent data from single individuals (● healthy controls (HC),  
 436 ■ RA-risk individuals (RA-risk), Δ early RA patients (RA).

437

438 **FIGURE 2**

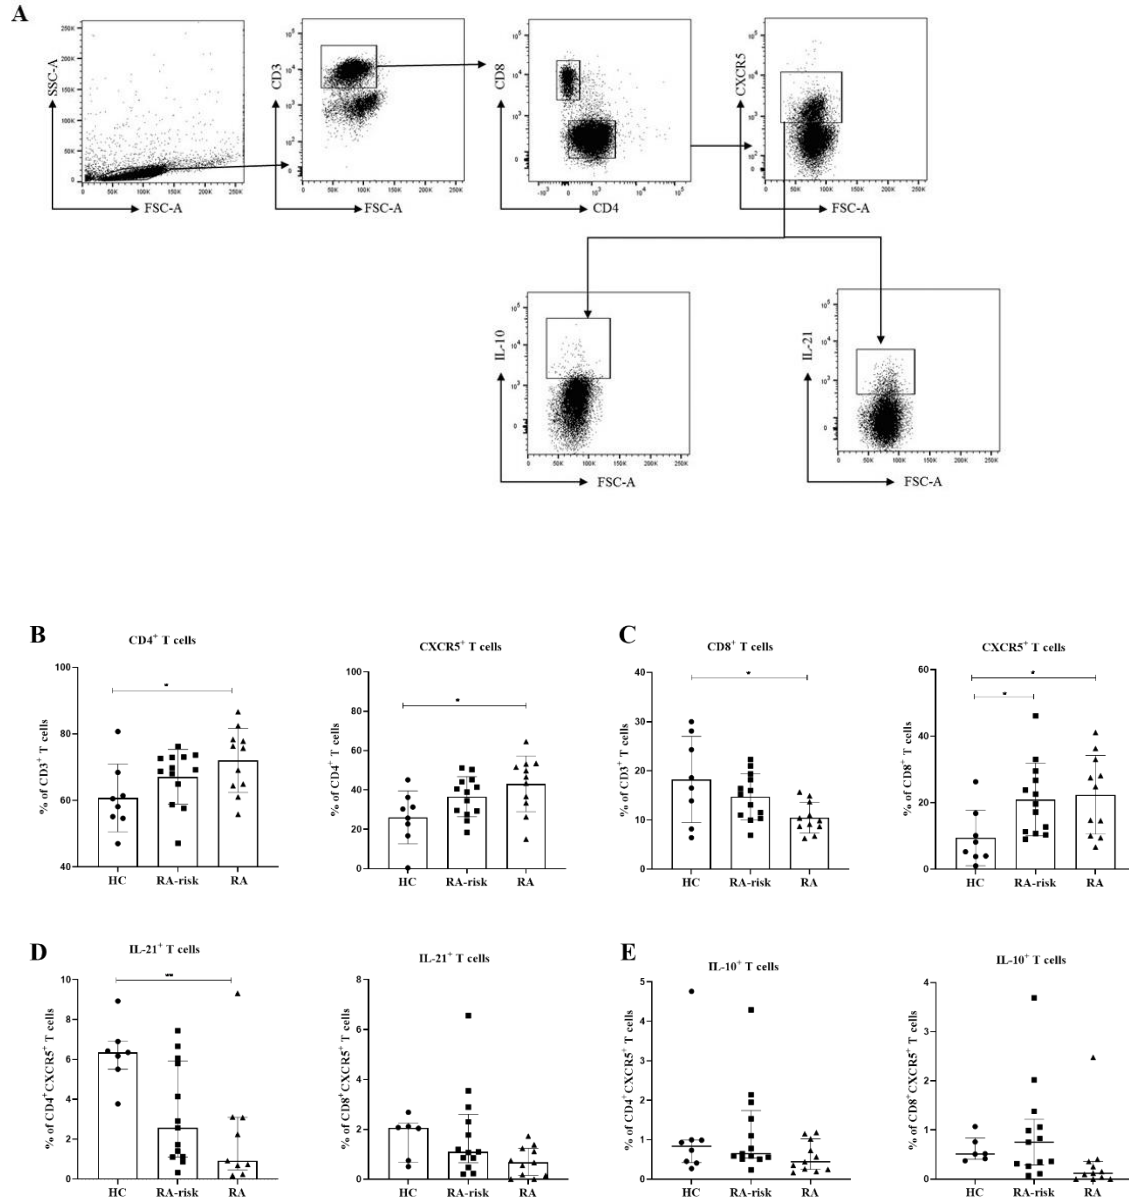

439

440

441 **Figure 2 | Analysis of Follicular helper T cells in lymph node biopsies. (A)** Gating strategy for  
 442 follicular-like T cells in lymph node biopsies using markers for CD3, CD4, CD8, CXCR5, IL21 and  
 443 IL-10. **(B, C)** Frequencies of CD4<sup>+</sup>, CD4<sup>+</sup>CXCR5<sup>+</sup>, CD8<sup>+</sup> and CD8<sup>+</sup>CXCR5<sup>+</sup> T cells in lymph nodes  
 444 are shown for healthy controls (HC, n=7), RA-risk individuals (RA-risk n=13) and early RA patients  
 445 (RA n=9). **(D, E)** The frequency of IL-21<sup>+</sup> and IL-10<sup>+</sup> cells within the CD4<sup>+</sup>CXCR5<sup>+</sup> and CD8<sup>+</sup>CXCR5<sup>+</sup>

446 populations are plotted. Not normally distributed data are presented as median with IQR and, normally  
 447 distributed data are presented in box plots and error bars represent mean with SD. For statistical  
 448 analysis Kruskal Wallis or one-way ANOVA (when appropriate) was performed and significant  
 449 differences were indicated as \* $p < 0.05$  or \*\* $p < 0.01$ . All symbols represent data from single individuals  
 450 (● healthy controls (HC), ■ RA-risk individuals (RA at-risk), Δ early RA patients (RA)).

451

452 **FIGURE 3**

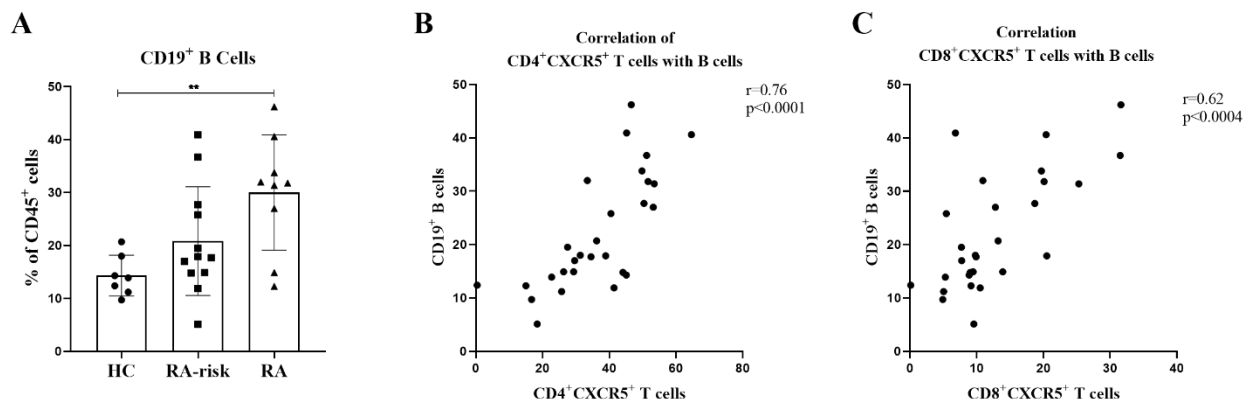

453

454 **Figure 3 | Correlation of CD19<sup>+</sup> B cells with CD4<sup>+</sup> and CD8<sup>+</sup> follicular helper T cells in LNs. (A)**  
 455 frequencies of CD19<sup>+</sup> B cells in LNs is shown for HCs, RA-risk and early RA patients. **(B)** Correlation  
 456 between the frequencies of CD4<sup>+</sup>CXCR5<sup>+</sup> Tfh cells and the frequencies of CD19<sup>+</sup> B cells in LN. **(C)**  
 457 Correlation between the frequencies of CD8<sup>+</sup>CXCR5<sup>+</sup> Tfh cells and the frequencies of CD19<sup>+</sup> B cells  
 458 in LNs. Correlations are shown for the total group. Error bars represent mean with SD. For statistical  
 459 analysis Kruskal Wallis or one-way ANOVA (when appropriate) was performed and significant  
 460 differences were indicated as \* $p < 0.05$  or \*\* $p < 0.01$ . All symbols represent data from single individuals  
 461 (● healthy controls (HC), ■ RA-risk individuals (RA at-risk), Δ early RA patients (RA)).

462

463 **Supplementary Figure 1** | Negative control (unstained sample) used for setting of gates for the  
464 analysis of CXCR5, CCR7, PD-1, IL-21 and IL-10 cells in PBMCs.

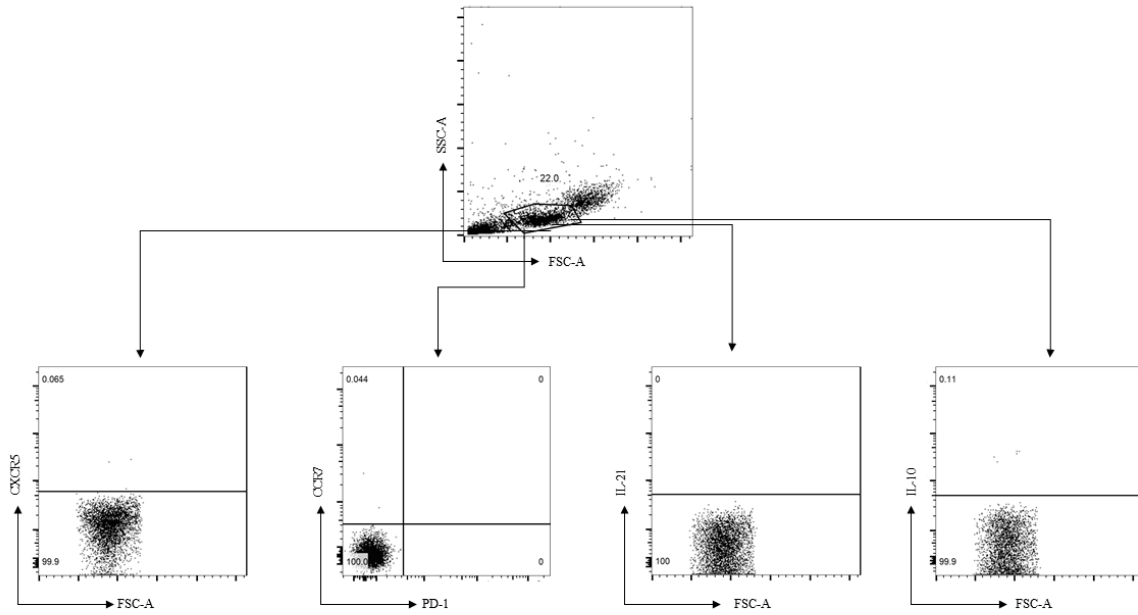

465
